# Supplementary material
Source: PubMed Central journal article supplement (PMC6861126)
Supplement: EMS82372-supplement-Supplementary_material.pdf [file EMS82372-supplement-Supplementary_material.pdf]

## Supplementary material

### Coordinated signals from the DNA repair enzymes PARP-1 and PARP-2 promotes B-cell development and function

Miguel A. Galindo-Campos<sup>1</sup>, Marie Bedora-Faure<sup>2</sup>, Jordi Farrés<sup>1</sup>, Chloé Lescale<sup>2</sup>, Lucia Moreno-Lama<sup>1</sup>, Carlos Martínez<sup>3</sup>, Juan Martín-Caballero<sup>4</sup>, Coral Ampurdanés<sup>1</sup>, Pedro Aparicio<sup>5</sup>, Françoise Dantzer<sup>6</sup>, Andrea Cerutti<sup>7,8</sup>, Ludovic Deriano<sup>2\*</sup>, José Yélamos<sup>1,9\*</sup>

#### Supplemental Figure legends

**Figure S1.- B-cell specific deletion of PARP-2 in a PARP-1-deficient background results in defective lymph nodes B cells.** Flow cytometry analysis of lymph nodes from 8 to 10-weeks old mice of the indicated genotype. (A) Representative dot-plots showing lymph node cells analyzed for the expression of the indicated markers. Percentage of cells in the individual subpopulations with regard to each gate is indicated in each quadrant. (B) Bars represent the percentage of lymph node B lymphocytes for the indicated genotype. Values represent the mean  $\pm$  SEM of at least 4 mice of each genotype. \*P < 0.05.

**Figure S2.- Effectiveness of PARP-2 deletion in marginal zone and follicular B cells from Cd19-cre;Parp-2<sup>f/f</sup> mice.** PCR analysis from genomic DNA in sorted T cells, marginal zone (MZ) and follicular (FO) splenic cells from mice of the indicated genotypes.

**Figure S3. Parp2 genotyping of v-abl pro-B cell lines**

**Figure S4. Igk rearrangements in v-abl pro-B cell lines.** PCR analysis of Vk6-23/Jk1 coding joints (upper panel) and Vk10-95/Jk4 coding joints (middle panel) from indicated v-abl pro-B cell lines untreated (-) and treated for 72h (+) with ABLki. Il-2 gene PCR (bottom panel) was used as a loading control.

**Figure S5.- 53BP1 DNA damage response foci in *v-abl* pro-B-cell lines.** (A) Representative 3D projections of 53BP1 immuno-staining conducted on ABLki-treated *v-abl* pro-B-cells. Nuclei were stained with anti-53BP1 antibody (green) and DAPI. Cells were imaged in 3D (9 Z stacks of 0.5  $\mu\text{m}$ ) using a Zeiss AxioImager Z2 microscope (x40 objective) and the Metacyte automated capture system (Metasystems), (B) Percentage of *v-abl* pro-B-cells of the indicated genotype harboring 1 or 2 53BP1 foci 65h post-ABLki treatment (See Table S3 for details).

**Figure S6.- PARP-1/PARP-2 doubly deficiency in B-cells did not alter basal immunoglobulin levels.** Total levels of IgM, IgG1, IgG2a, IgG2b and IgG3 were assessed in the sera of 6-8-weeks old mice of the indicated genotypes by ELISA. Dots represent individual mice and horizontal lines represent median values.

**Figure S7.- PARP-1/PARP-2 doubly deficiency in B-cells did not alter the percentage of germinal center B cells in Peyer's patches.** (A) Representative dot-plots of B220<sup>+</sup> B lymphocytes in Peyer's patches isolated from 10-12 weeks-old mice of the indicated genotypes. Percentage of Germinal centres (GC) B cells (GL7<sup>+</sup>CD95<sup>+</sup>) cells is indicated. (B) Graph showing the percentage of GC in Peyer's patches. Values represent the mean  $\pm$  SEM of 5 mice of each genotype.

### Supplemental Table legends

**Table S1.- Renewal and production rates of bone marrow B cell subsets determined by in vivo BrdU labeling.** The percentage of BrdU-labeled bone marrow B cell subsets was determined by flow cytometry and the number of BrdU-labeled cells was calculated by multiplying the percentage BrdU<sup>+</sup>-cells of each population by the total number of cells in that population. The regression coefficients of proportional and absolute BrdU labeling versus time provide estimations of renewal and production, respectively. \*P < 0.05; \*\*P < 0.001.

**Table S2.- List and origin of *v-abl* pro-B-cell lines**

**Table S3.- 53BP1 DNA damage response foci after RAG induction.** Number and percentage of *v-abl* pro-B-cells harboring 0, 1, 2 or >2 53BP1 foci 65 hours after ABLki

treatment.

**Table S4. Genomic instability at the *Igk* locus in *v-abl* pro-B-cells.** Number and percentage of aberrant metaphases harboring chromosome breaks and/or translocations involving the *Igk* locus from untreated and ABLki-treated and released (shown in Figure 3E and F) *v-abl* pro-B-cell lines of the indicated genotypes are indicated. DNA FISH experiments were performed using probes centromeric (*Igk V*) and telomeric (*Igk C*) to the *Igk* locus plus specific paint for chromosome 6.

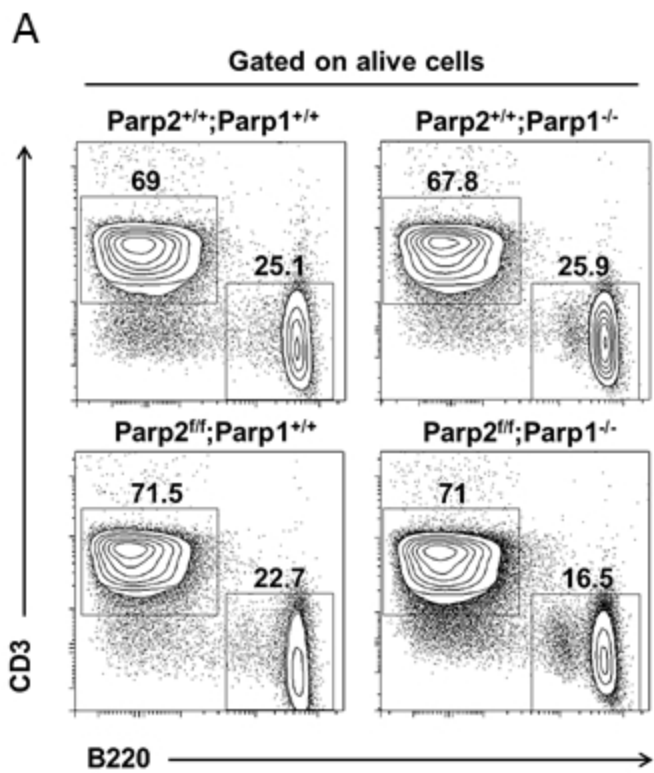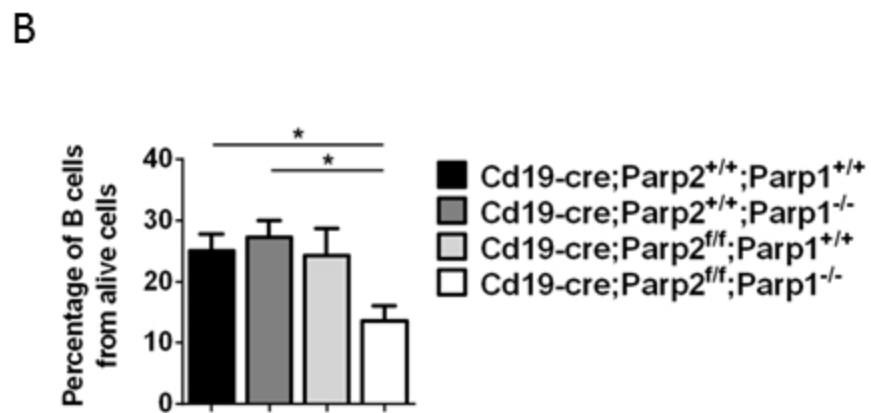

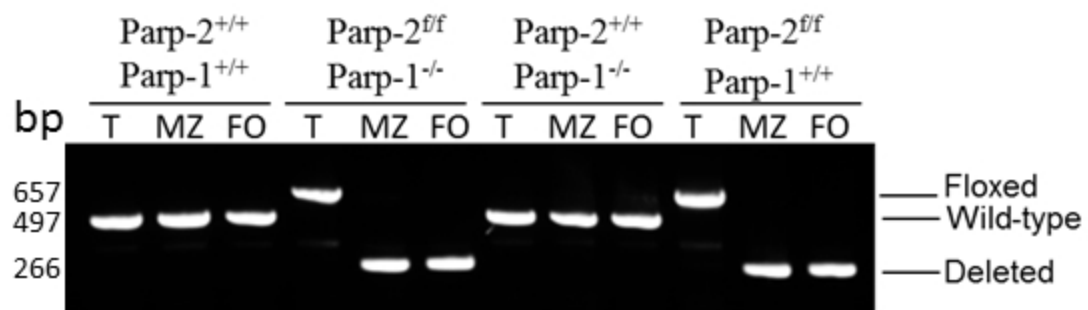

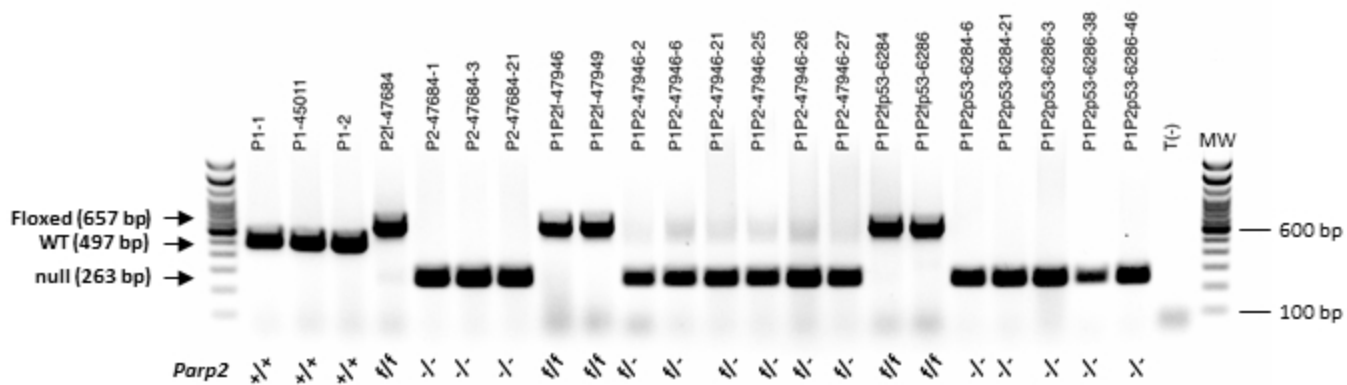

Galindo-Campos et al., Fig. S3

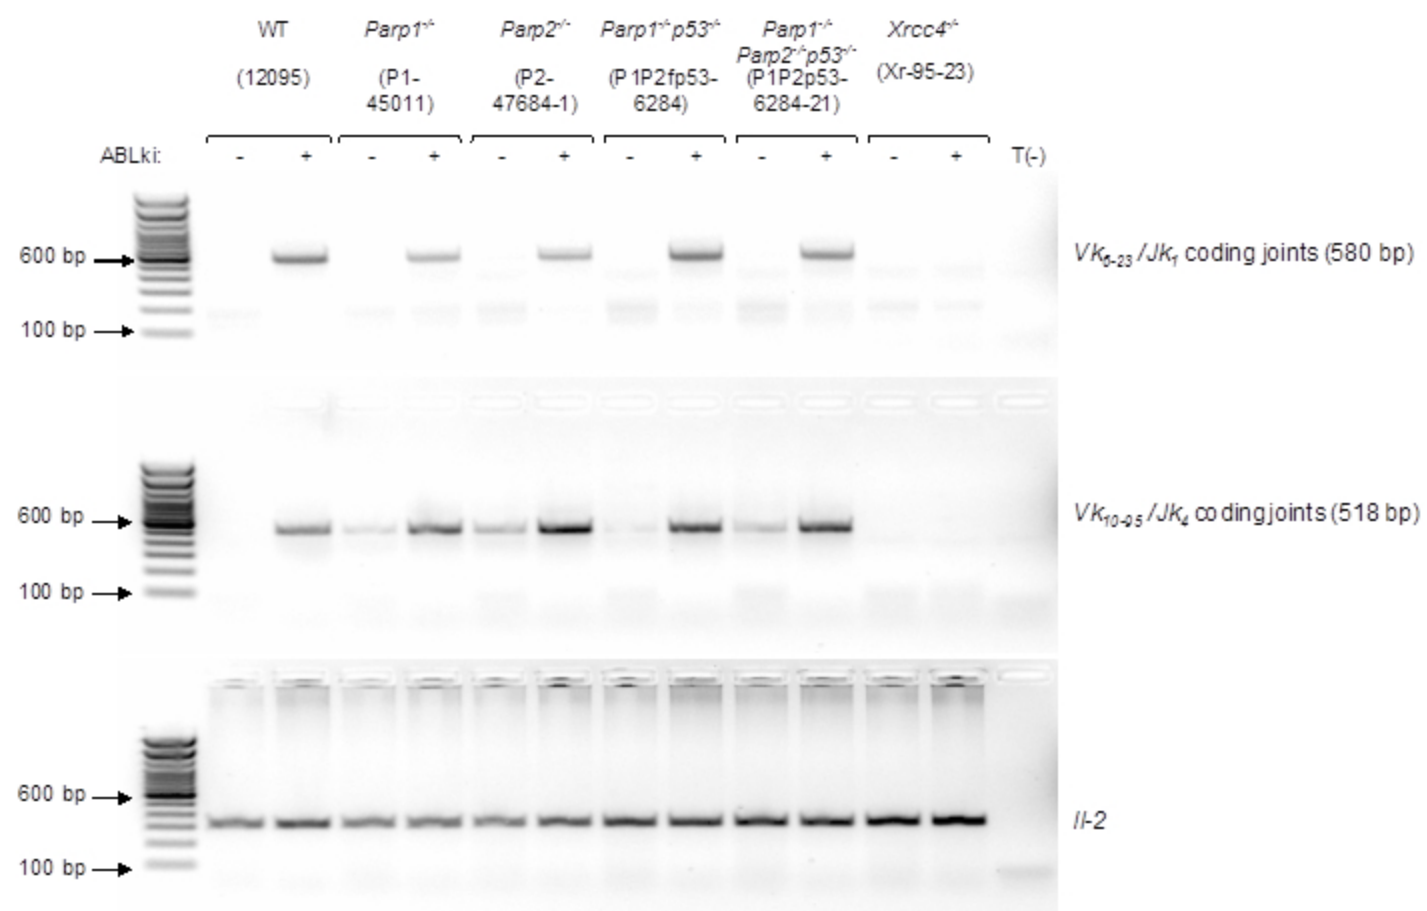

Galindo-Campos et al., Fig. S4

A

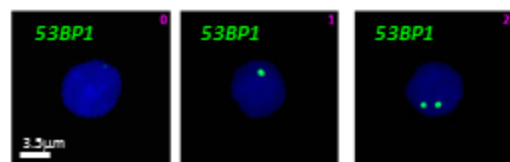

B

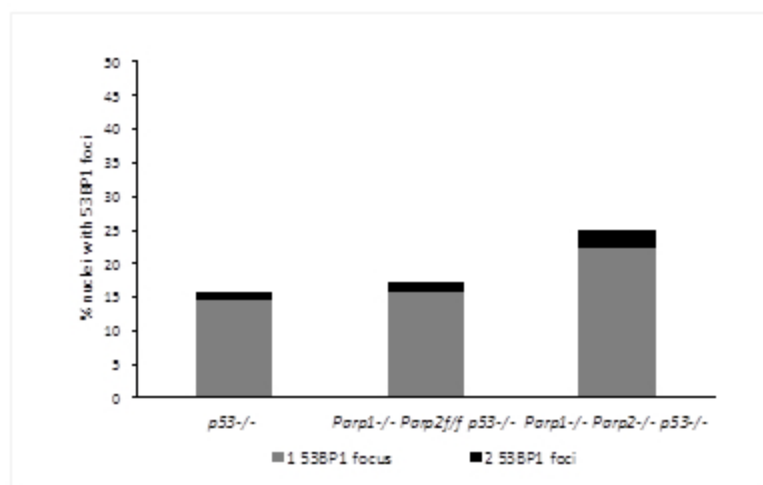



- Cd19-cre;Parp2<sup>+/+</sup>;Parp1<sup>+/+</sup>
- Cd19-cre;Parp2<sup>+/+</sup>;Parp1<sup>-/-</sup>
- ▲ Cd19-cre;Parp2<sup>f/f</sup>;Parp1<sup>+/+</sup>
- ◇ Cd19-cre;Parp2<sup>f/f</sup>;Parp1<sup>-/-</sup>

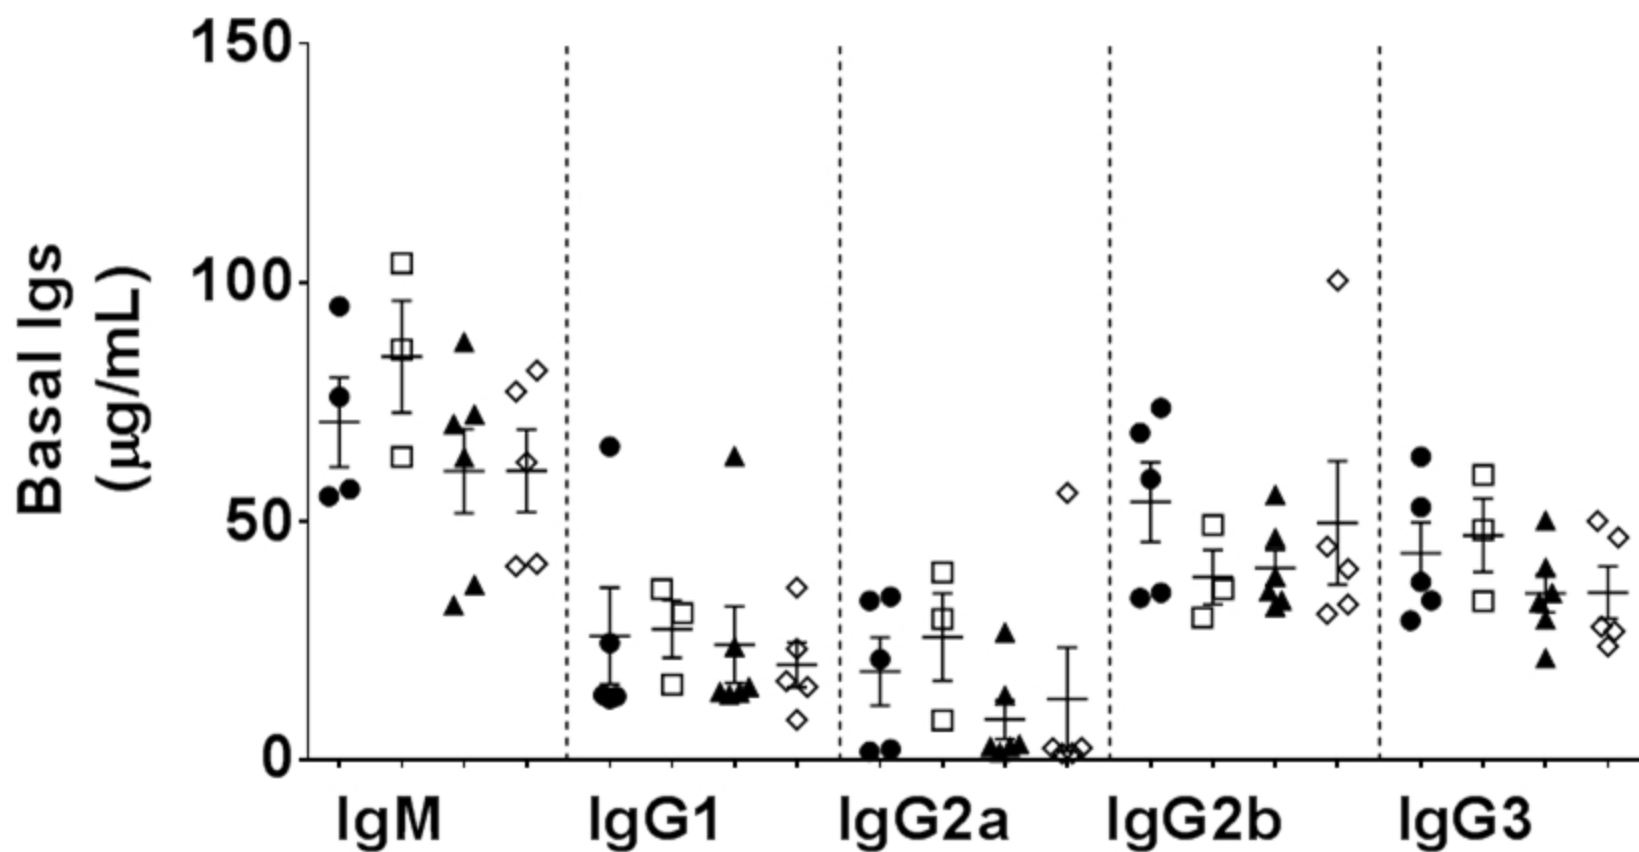

A

Gated on B220<sup>+</sup> cells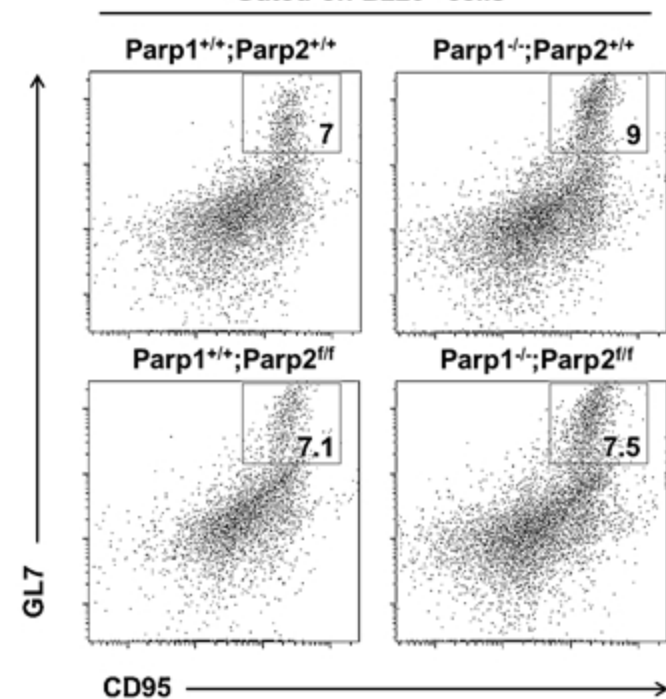

B

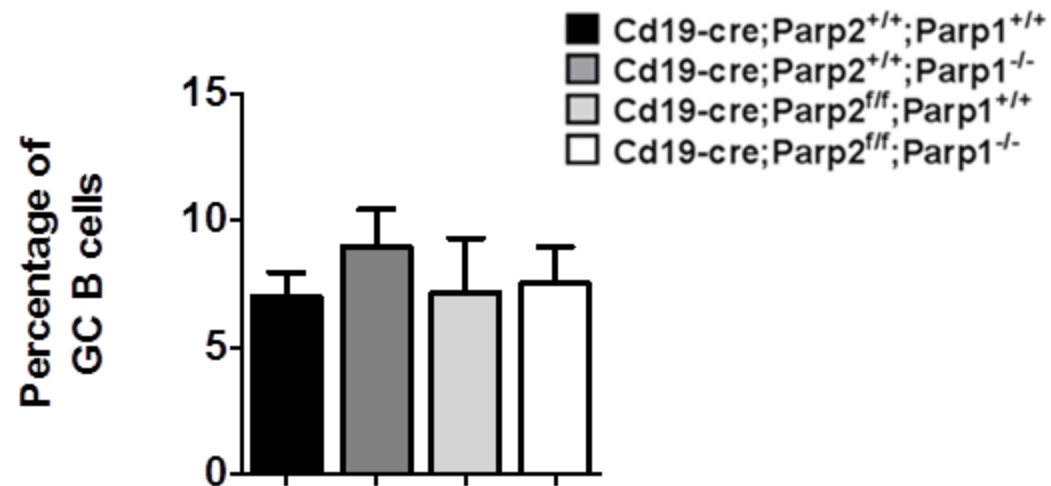

Table S1.- Renewal and production rates of bone marrow B cell subsets determined by in vivo BrdU labeling.

|                      |                                               | <b>Cd19-cre</b>                                     |                                                     |                                                       |                                                       |
|----------------------|-----------------------------------------------|-----------------------------------------------------|-----------------------------------------------------|-------------------------------------------------------|-------------------------------------------------------|
|                      |                                               | <b>Parp2<sup>+/+</sup>;<br/>Parp1<sup>+/+</sup></b> | <b>Parp2<sup>+/+</sup>;<br/>Parp1<sup>-/-</sup></b> | <b>Parp2<sup>fl/fl</sup>;<br/>Parp1<sup>+/+</sup></b> | <b>Parp2<sup>fl/fl</sup>;<br/>Parp1<sup>-/-</sup></b> |
| <b>Fraction A-C'</b> | Renewal rate (% of pool/day)                  | 33.29                                               | 34.29                                               | 34.66                                                 | 34.87                                                 |
|                      | Production rate (cells/day X10 <sup>6</sup> ) | 0.64                                                | 0.57                                                | 0.55                                                  | 0.55                                                  |
| <b>Fraction D</b>    | Renewal rate (% of pool/day)                  | 39.80                                               | 39.69                                               | 38.75                                                 | 39.62                                                 |
|                      | Production rate (cells/day X10 <sup>6</sup> ) | 2.44                                                | 2.27                                                | 2.21                                                  | 0.95 ***                                              |
| <b>Fraction E</b>    | Renewal rate (% of pool/day)                  | 26.72                                               | 24.08                                               | 23.73                                                 | 26.91                                                 |
|                      | Production rate (cells/day X10 <sup>6</sup> ) | 0.89                                                | 0.79                                                | 0.86                                                  | 0.52*                                                 |

\*P < 0.05; \*\*\*P < 0.001

**Table S2. List and origin of *v-abl* pro-B cell lines**

| Genotype                                                           | Cell line       | Generation method                                            | Origin        |
|--------------------------------------------------------------------|-----------------|--------------------------------------------------------------|---------------|
| WT                                                                 | WT-47947        | <i>v-Abl/Bcl2</i> immortalization of bone marrow pro-B cells | Mouse         |
|                                                                    | WT-1            | <i>v-Abl/Bcl2</i> immortalization of bone marrow pro-B cells | Mouse         |
|                                                                    | WT-47947-4      | Cell clone                                                   | WT-47947      |
|                                                                    | 12095           | <i>v-Abl/Bcl2</i> immortalization of bone marrow pro-B cells | Mouse         |
| <i>Parp2<sup>fl/fl</sup></i>                                       | P2f-47684       | <i>v-Abl/Bcl2</i> immortalization of bone marrow pro-B cells | Mouse         |
| <i>Parp2<sup>-/-</sup></i>                                         | P2-47684-1      | Cre infection                                                | P2f-47684     |
|                                                                    | P2-47684-3      | Cre infection                                                | P2f-47684     |
|                                                                    | P2-47684-21     | Cre infection                                                | P2f-47684     |
| <i>Parp1<sup>-/-</sup></i>                                         | P1-1            | <i>v-Abl/Bcl2</i> immortalization of bone marrow pro-B cells | Mouse         |
|                                                                    | P1-45011        | <i>v-Abl/Bcl2</i> immortalization of bone marrow pro-B cells | Mouse         |
|                                                                    | P1-2            | Cell clone                                                   | JYL-Pa1       |
| <i>Parp1<sup>-/-</sup> Parp2<sup>fl/fl</sup></i>                   | P1P2f-47946     | <i>v-Abl/Bcl2</i> immortalization of bone marrow pro-B cells | Mouse         |
|                                                                    | P1P2f-47949     | <i>v-Abl/Bcl2</i> immortalization of bone marrow pro-B cells | Mouse         |
| <i>Parp1<sup>-/-</sup> Parp2<sup>fl/fl</sup></i>                   | P1P2-47946-2    | Cre infection                                                | P1P2f-47946   |
|                                                                    | P1P2-47946-6    | Cre infection                                                | P1P2f-47946   |
|                                                                    | P1P2-47946-21   | Cre infection                                                | P1P2f-47946   |
|                                                                    | P1P2-47946-25   | Cre infection                                                | P1P2f-47946   |
|                                                                    | P1P2-47946-26   | Cre infection                                                | P1P2f-47946   |
|                                                                    | P1P2-47946-27   | Cre infection                                                | P1P2f-47946   |
| <i>Parp1<sup>-/-</sup> Parp2<sup>fl/fl</sup> p53<sup>-/-</sup></i> | P1P2fp53-6284   | <i>v-Abl/Bcl2</i> immortalization of bone marrow pro-B cells | Mouse         |
|                                                                    | P1P2fp53-6286   | <i>v-Abl/Bcl2</i> immortalization of bone marrow pro-B cells | Mouse         |
| <i>Parp1<sup>-/-</sup> Parp2<sup>-/-</sup> p53<sup>-/-</sup></i>   | P1P2p53-6284-6  | Cre infection                                                | P1P2fp53-6284 |
|                                                                    | P1P2p53-6284-21 | Cre infection                                                | P1P2fp53-6284 |
|                                                                    | P1P2p53-6286-3  | Cre infection                                                | P1P2fp53-6286 |
|                                                                    | P1P2p53-6286-38 | Cre infection                                                | P1P2fp53-6286 |
|                                                                    | P1P2p53-6286-46 | cre infection                                                | P1P2fp53-6286 |
| <i>p53<sup>-/-</sup></i>                                           | 15307           | <i>v-Abl/Bcl2</i> immortalization of bone marrow pro-B cells | Mouse         |
| <i>Xrcc4<sup>-/-</sup></i>                                         | Xr-95-23        | CRISPR/Cas9 editing                                          | 12095         |

**Table S3. 53BP1 DDR foci after RAG induction. Related to Figure 3.**

Number and percentage of *v-abl* pro-B cells harboring 0, 1, 2 or >2 53BP1 foci 65 hours after ABLki treatment.

|              | p53 <sup>-/-</sup>      |           |          | Parp1 <sup>-/-</sup> Parp2 <sup>f/f</sup> p53 <sup>-/-</sup> |           |          | Parp1 <sup>-/-</sup> Parp2 <sup>-/-</sup> p53 <sup>-/-</sup> |           |          |
|--------------|-------------------------|-----------|----------|--------------------------------------------------------------|-----------|----------|--------------------------------------------------------------|-----------|----------|
|              | 15307                   |           |          | 6284                                                         |           |          | 6284-6                                                       |           |          |
| Cell line #1 | Nb of 53BP1 foci/nuclei | Nuclei Nb | Nuclei % | Nb of 53BP1 foci/nuclei                                      | Nuclei Nb | Nuclei % | Nb of 53BP1 foci/nuclei                                      | Nuclei Nb | Nuclei % |
|              | 0                       | 3926      | 83,9     | 0                                                            | 4199      | 83,9     | 0                                                            | 3033      | 82,1     |
|              | 1                       | 687       | 14,7     | 1                                                            | 750       | 15       | 1                                                            | 532       | 14,4     |
|              | 2                       | 56        | 1,2      | 2                                                            | 48        | 1        | 2                                                            | 92        | 2,5      |
|              | >2                      | 11        | 0,2      | >2                                                           | 8         | 0,1      | >2                                                           | 36        | 1,1      |
|              | TOTAL                   | 4680      | 100      | TOTAL                                                        | 5005      | 100      | TOTAL                                                        | 3693      | 100      |
| Cell line #2 |                         |           |          | 6286                                                         |           |          | 6284-21                                                      |           |          |
|              | Nb of 53BP1 foci/nuclei | Nuclei Nb | Nuclei % | Nb of 53BP1 foci/nuclei                                      | Nuclei Nb | Nuclei % | Nb of 53BP1 foci/nuclei                                      | Nuclei Nb | Nuclei % |
|              | 0                       | 4098      | 81,6     | 0                                                            | 3735      | 74,6     | 0                                                            | 3735      | 74,6     |
|              | 1                       | 832       | 16,6     | 1                                                            | 1121      | 22,4     | 1                                                            | 1121      | 22,4     |
|              | 2                       | 74        | 1,5      | 2                                                            | 126       | 2,5      | 2                                                            | 126       | 2,5      |
|              | >2                      | 16        | 0,2      | >2                                                           | 22        | 0,5      | >2                                                           | 22        | 0,5      |
|              | TOTAL                   | 5020      | 100      | TOTAL                                                        | 5004      | 100      | TOTAL                                                        | 5004      | 100      |
| Cell line #3 |                         |           |          | 6286-38                                                      |           |          |                                                              |           |          |
|              | Nb of 53BP1 foci/nuclei | Nuclei Nb | Nuclei % | Nb of 53BP1 foci/nuclei                                      | Nuclei Nb | Nuclei % | Nb of 53BP1 foci/nuclei                                      | Nuclei Nb | Nuclei % |
|              | 0                       | 1768      | 62       | 0                                                            | 1768      | 62       | 0                                                            | 1768      | 62       |
|              | 1                       | 903       | 31,7     | 1                                                            | 903       | 31,7     | 1                                                            | 903       | 31,7     |
|              | 2                       | 141       | 4,9      | 2                                                            | 141       | 4,9      | 2                                                            | 141       | 4,9      |
|              | >2                      | 40        | 1,4      | >2                                                           | 40        | 1,4      | >2                                                           | 40        | 1,4      |
|              | TOTAL                   | 2852      | 100      | TOTAL                                                        | 2852      | 100      | TOTAL                                                        | 2852      | 100      |
| Cell line #4 |                         |           |          | 6286-46                                                      |           |          |                                                              |           |          |
|              | Nb of 53BP1 foci/nuclei | Nuclei Nb | Nuclei % | Nb of 53BP1 foci/nuclei                                      | Nuclei Nb | Nuclei % | Nb of 53BP1 foci/nuclei                                      | Nuclei Nb | Nuclei % |
|              | 0                       | 3634      | 77,1     | 0                                                            | 3634      | 77,1     | 0                                                            | 3634      | 77,1     |
|              | 1                       | 945       | 20,1     | 1                                                            | 945       | 20,1     | 1                                                            | 945       | 20,1     |
|              | 2                       | 94        | 2        | 2                                                            | 94        | 2        | 2                                                            | 94        | 2        |
|              | >2                      | 38        | 0,7      | >2                                                           | 38        | 0,7      | >2                                                           | 38        | 0,7      |
|              | TOTAL                   | 4711      | 100      | TOTAL                                                        | 4711      | 100      | TOTAL                                                        | 4711      | 100      |

**Table S4. Genomic instability at the *Igk* locus in *v-abl* pro-B cells. (Related to Figure 3)**

Number and percentage of aberrant metaphases harboring chromosome breaks and/or translocations involving the *Igk* locus from untreated and ABLki-treated and released (shown in Figure 3E and F) *v-abl* pro-B cell lines of the indicated genotypes are indicated. DNA FISH experiments were performed using probes centromeric (*Igk V*) and telomeric (*Igk C*) to the *Igk* locus plus specific paint for chromosome 6.

|                                                                                     |                   | Untreated                                    |                                           |                           |                         |                           |                       |
|-------------------------------------------------------------------------------------|-------------------|----------------------------------------------|-------------------------------------------|---------------------------|-------------------------|---------------------------|-----------------------|
| Genotype                                                                            | Cell line #       | Metaphases with <i>Igk</i> chromosome breaks | Metaphases with <i>Igk</i> translocations | Total aberrant metaphases | Total normal metaphases | Total metaphases analyzed | % aberrant metaphases |
| <i>p53</i> <sup>-/-</sup>                                                           | 15307             | 0                                            | 0                                         | 0                         | 120                     | 120                       | 0                     |
|                                                                                     | Pa1Pa2fp53-6284   | 0                                            | 0                                         | 0                         | 105                     | 105                       | 0                     |
|                                                                                     | Pa1Pa2fp53-6286   | 0                                            | 0                                         | 0                         | 183                     | 183                       | 0                     |
|                                                                                     | TOTAL             | 0                                            | 0                                         | 0                         | 288                     | 288                       | 0                     |
| <i>Parp1</i> <sup>-/-</sup> <i>Parp2</i> <sup>fl/fl</sup> <i>p53</i> <sup>-/-</sup> | Pa1Pa2p53-6284-6  | 2                                            | 0                                         | 2                         | 98                      | 100                       | 2                     |
|                                                                                     | Pa1Pa2p53-6284-21 | 0                                            | 0                                         | 0                         | 100                     | 100                       | 0                     |
|                                                                                     | Pa1Pa2p53-6284-30 | 0                                            | 0                                         | 0                         | 100                     | 100                       | 0                     |
|                                                                                     | Pa1Pa2p53-6286-38 | 0                                            | 0                                         | 0                         | 100                     | 100                       | 0                     |
|                                                                                     | Pa1Pa2p53-6286-46 | 0                                            | 0                                         | 0                         | 100                     | 100                       | 0                     |
|                                                                                     | TOTAL             | 2                                            | 0                                         | 2                         | 498                     | 500                       | 0,4                   |

|                                                                                   |                   | ABLki treated and released                   |                                           |                           |                         |                           |                       |
|-----------------------------------------------------------------------------------|-------------------|----------------------------------------------|-------------------------------------------|---------------------------|-------------------------|---------------------------|-----------------------|
| Genotype                                                                          | Cell line #       | Metaphases with <i>Igk</i> chromosome breaks | Metaphases with <i>Igk</i> translocations | Total aberrant metaphases | Total normal metaphases | Total metaphases analyzed | % aberrant metaphases |
| <i>p53</i> <sup>-/-</sup>                                                         | 15307             | 0                                            | 3                                         | 3                         | 98                      | 101                       | 3                     |
|                                                                                   | Pa1Pa2fp53-6284   | 0                                            | 1                                         | 1                         | 104                     | 105                       | 0,9                   |
|                                                                                   | Pa1Pa2fp53-6286   | 0                                            | 4                                         | 4                         | 96                      | 100                       | 4                     |
|                                                                                   | TOTAL             | 0                                            | 5                                         | 5                         | 200                     | 205                       | 2,4                   |
| <i>Parp1</i> <sup>-/-</sup> <i>Parp2</i> <sup>-/-</sup> <i>p53</i> <sup>-/-</sup> | Pa1Pa2p53-6284-6  | 0                                            | 3                                         | 3                         | 95                      | 98                        | 3,1                   |
|                                                                                   | Pa1Pa2p53-6284-21 | 0                                            | 2                                         | 2                         | 98                      | 100                       | 2                     |
|                                                                                   | Pa1Pa2p53-6284-30 | 1                                            | 3                                         | 4                         | 97                      | 101                       | 4                     |
|                                                                                   | Pa1Pa2p53-6286-38 | 0                                            | 3                                         | 3                         | 97                      | 100                       | 3                     |
|                                                                                   | Pa1Pa2p53-6286-46 | 2                                            | 0                                         | 2                         | 98                      | 100                       | 2                     |
|                                                                                   | TOTAL             | 3                                            | 11                                        | 14                        | 485                     | 499                       | 3                     |

| Statistical analysis (Fisher exact test)                                            |                                                                                        | p value | Level |
|-------------------------------------------------------------------------------------|----------------------------------------------------------------------------------------|---------|-------|
| <i>p53</i> <sup>-/-</sup>                                                           | vs <i>Parp1</i> <sup>-/-</sup> <i>Parp2</i> <sup>fl/fl</sup> <i>p53</i> <sup>-/-</sup> | 0,7     | n.s   |
|                                                                                     | vs <i>Parp1</i> <sup>-/-</sup> <i>Parp2</i> <sup>-/-</sup> <i>p53</i> <sup>-/-</sup>   | 1       | n.s   |
| <i>Parp1</i> <sup>-/-</sup> <i>Parp2</i> <sup>fl/fl</sup> <i>p53</i> <sup>-/-</sup> | vs <i>Parp1</i> <sup>-/-</sup> <i>Parp2</i> <sup>-/-</sup> <i>p53</i> <sup>-/-</sup>   | 1       | n.s   |
